# Supplementary material for: An extensive (co-)expression analysis tool for the cytochrome P450 superfamily in Arabidopsis thaliana
Source: PubMed Central journal article supplement (PMC2383897; doi:10.1186/1471-2229-8-47), 2008-04-23
Supplement: 1471-2229-8-47-S3.pdf [file 1471-2229-8-47-S3.pdf]

**Additional File 3 Pathway predictions based on co-expression analysis of P450s with known functions**

| Name                                        | Co-expressed pathway                               | Source    | Known pathway <sup>a</sup>                                                      | Description <sup>a</sup>                                                                    |
|---------------------------------------------|----------------------------------------------------|-----------|---------------------------------------------------------------------------------|---------------------------------------------------------------------------------------------|
| <b>P450s with correct prediction:</b>       |                                                    |           |                                                                                 |                                                                                             |
| CYP51G1<br>(CYP51A2)                        | sterol biosynthesis                                | BioPath   | sterol / steroid metabolism                                                     | obtusifoliol 14 $\alpha$ -demethylase                                                       |
| CYP701A3,<br>GA3                            | gibberellin metabolism                             | LitPath   | gibberellin metabolism                                                          | multifunctional ent-kaurene oxidase                                                         |
| CYP707A1                                    | abscisic acid biosynthesis                         | AraCyc    | abscisic acid degradation                                                       | abscisic acid 8'-hydroxylase                                                                |
| CYP734A1,<br>BAS1                           | triterpene, sterol, and brassinosteroid metabolism | LitPath   | brassinolide degradation                                                        | 26-hydroxylase for brassinolide and castasterone                                            |
| CYP73A5,<br>C4H                             | lignin biosynthesis                                | AraCyc    | phenylpropanoid metabolism, lignin biosynthesis                                 | cinnamic acid 4-hydroxylase                                                                 |
| CYP74A,<br>AOS                              | jasmonic acid biosynthesis                         | TAIR-GO   | oxylipin pathway, jasmonate biosynthesis                                        | allene oxide synthase                                                                       |
| CYP74B2,<br>HPL1                            | lipoxygenase pathway                               | AraCyc    | oxylipin pathway                                                                | hydroperoxide lyase                                                                         |
| CYP75B1,<br>F3'H                            | flavonoid biosynthesis                             | TAIR-GO   | flavonoid biosynthesis                                                          | flavonoid 3'-hydroxylase                                                                    |
| CYP79B3                                     | glucosinolate metabolism                           | LitPath   | indole glucosinolate biosynthesis / camalexin biosynthesis / auxin biosynthesis | conversion of tryptophan to oxime                                                           |
| CYP79F1,<br>SPS, BUS1                       | glucosinolate metabolism                           | LitPath   | aliphatic glucosinolate biosynthesis                                            | conversion of mono to hexahomomethionine                                                    |
| CYP79F2                                     | glucosinolate metabolism                           | LitPath   | long chain aliphatic glucosinolate biosynthesis                                 | long chain penta and hexahomomethionine in synthesis of long chain aliphatic glucosinolates |
| CYP83A1,<br>REF2                            | glucosinolate metabolism                           | LitPath   | aliphatic glucosinolate biosynthesis                                            | oxidation of methionine-derived oximes                                                      |
| CYP83B1,<br>SUR2,<br>RNT1,<br>RED1,<br>ATR4 | glucosinolate metabolism                           | LitPath   | indole glucosinolate biosynthesis                                               | oxidation of indole-3-acetylloxime                                                          |
| CYP84A1,<br>F5H, FAH1                       | lignin biosynthesis                                | TAIR-GO   | phenylpropanoid metabolism, S-lignin biosynthesis                               | coniferaldehyde 5-hydroxylase                                                               |
| CYP85A2,<br>BR6OX2                          | brassinosteroid biosynthesis                       | TAIR-GO   | brassinolide metabolism                                                         | brassinosteroid-6-oxidase                                                                   |
| CYP86A4                                     | fatty acid elongation and wax and cutin metabolism | AcylLipid | fatty acid metabolism                                                           | short-chain fatty acid $\omega$ -hydroxylase (lauric acid to $\omega$ -hydroxylauric acid)  |
| CYP86A7                                     | fatty acid elongation and wax and cutin metabolism | AcylLipid | fatty acid metabolism                                                           | short-chain fatty acid $\omega$ -hydroxylase (lauric acid to $\omega$ -hydroxylauric acid)  |
| CYP86A8,<br>LCR                             | fatty acid elongation and wax and cutin metabolism | AcylLipid | fatty acid metabolism                                                           | lacerata; $\omega$ -hydroxylase for saturated and unsaturated C12 to C18 fatty acids        |
| CYP88A3,<br>KAO1                            | gibberellin metabolism                             | LitPath   | gibberellin metabolism                                                          | multifunctional ent-kaurenoic acid oxidase                                                  |
| CYP90B1,<br>DWF4                            | triterpene, sterol, and brassinosteroid metabolism | LitPath   | brassinosteroid metabolism                                                      | steroid C-22 hydroxylase (campestanol to 6-deoxocasterone)                                  |
| CYP90C1,<br>ROT3                            | steroid biosynthesis                               | TAIR-GO   | brassinolide metabolism                                                         | steroid C-2 $\alpha$ hydroxylase (typhasterol to castasterone)                              |

---

**Additional File 3 Pathway predictions based on co-expression analysis of P450s with known functions**


---

|                                                   |                                                                                               |         |                                                                                              |                                                                                            |
|---------------------------------------------------|-----------------------------------------------------------------------------------------------|---------|----------------------------------------------------------------------------------------------|--------------------------------------------------------------------------------------------|
| CYP90D1                                           | brassinosteroid biosynthesis                                                                  | TAIR-GO | brassinolide metabolism                                                                      | downstream brassinosteroid synthesis, exact substrate not identified                       |
| CYP97A3, LUT5                                     | plastidial isoprenoids (chlorophylls, carotenoids, tocopherols, plastoquinone, phylloquinone) | BioPath | carotenoid metabolism                                                                        | $\alpha$ -carotene $\beta$ -ring hydroxylase                                               |
| CYP98A3, C3H                                      | lignin biosynthesis                                                                           | AraCyc  | phenylpropanoid metabolism, lignin biosynthesis                                              | 4-coumaryl shikimic/quinic ester 3'-hydroxylase                                            |
| <b>P450s with correct tendency in prediction:</b> |                                                                                               |         |                                                                                              |                                                                                            |
| CYP79B2                                           | tryptophan biosynthesis                                                                       | TAIR-GO | indole glucosinolate biosynthesis / auxin biosynthesis / biosynthesis tryptophan derivatives | conversion of tryptophan and tryptophan analogs to oximeesis                               |
| CYP97C1, LUT1                                     | chlorophyll biosynthesis                                                                      | AraCyc  | carotenoid metabolism                                                                        | carotenoid $\epsilon$ -ring hydroxylase                                                    |
| CYP71B15, PAD3                                    | tryptophan biosynthesis                                                                       | TAIR-GO | camalexin biosynthesis, biosynthesis tryptophan derivatives                                  | conversion of (S)-dihydrocamalexin acid to camalexin                                       |
| <b>P450s with no prediction:</b>                  |                                                                                               |         |                                                                                              |                                                                                            |
| CYP85A1, BR6OX                                    | no co-expressed pathway                                                                       | -       | brassinolide metabolism                                                                      | brassinosteroid-6-oxidase                                                                  |
| CYP79A2                                           | no co-expressed pathway                                                                       | -       | benzylglucosinolate biosynthesis                                                             | conversion of phenylalanine to oxime                                                       |
| CYP72C1, SHK1, SOB7, CHI2                         | no co-expressed pathway                                                                       | -       | brassinosteroid degradation                                                                  | controls brassinosteroid (BR) homeostasis by modulating BR concentration                   |
| CYP88A4, KAO2                                     | no co-expressed pathway                                                                       | -       | gibberellin metabolism                                                                       | multifunctional ent-kaurenoic acid oxidase                                                 |
| <b>P450s with wrong prediction:</b>               |                                                                                               |         |                                                                                              |                                                                                            |
| CYP710A2                                          | $\gamma$ -hexachlorocyclohexane degradation                                                   | KEGG    | sterol biosynthesis                                                                          | Sterol C-22 desaturase (24-epi-campesterol to brassicasterol)                              |
| CYP710A1                                          | phenylpropanoid metabolism                                                                    | BioPath | sterol biosynthesis                                                                          | Sterol C-22 desaturase ( $\beta$ -sitosterol to stigmasterol)                              |
| CYP711A1, MAX1                                    | core phenylpropanoid metabolism                                                               | BioPath | carotenoid metabolism                                                                        | Biosynthesis of a likely carotenoid-derived hormone with branch-inhibiting activity        |
| CYP735A1                                          | cell Wall Carbohydrate metabolism                                                             | BioPath | cytokinin metabolism                                                                         | trans-hydroxylase for isopentenyladenine, tri/di/monophosphates                            |
| CYP735A2                                          | cell Wall Carbohydrate metabolism                                                             | BioPath | cytokinin metabolism                                                                         | trans-hydroxylase for isopentenyladenine, tri/di/monophosphates                            |
| CYP90A1, CPD                                      | chlorophyll biosynthesis                                                                      | TAIR-GO | brassinolide metabolism                                                                      | steroid 23 $\alpha$ hydroxylase (cathasterone to teasterone)                               |
| CYP86A1                                           | stilbene, coumarine and lignin biosynthesis                                                   | KEGG    | fatty acid metabolism                                                                        | $\omega$ -hydroxylase for saturated and unsaturated C12 to C18 fatty acids                 |
| CYP86A2                                           | chlorophyll biosynthesis                                                                      | TAIR-GO | fatty acid metabolism, cutin biosynthesis                                                    | short-chain fatty acid $\omega$ -hydroxylase (lauric acid to $\omega$ -hydroxylauric acid) |
| CYP707A4                                          | sterol biosynthesis                                                                           | BioPath | abscisic acid degradation                                                                    | abscisic acid 8'-hydroxylase                                                               |
| CYP707A3                                          | secondary metabolism                                                                          | FunCat  | abscisic acid degradation                                                                    | abscisic acid 8'-hydroxylase                                                               |
| CYP707A2                                          | phenylpropanoid metabolism                                                                    | BioPath | abscisic acid degradation                                                                    | abscisic acid 8'-hydroxylase                                                               |

---

<sup>a</sup> references can be found at the CYPedia home page (Table 2)

---
